# Supplementary material for: Maternal death audit in Rwanda 2009–2013: a nationwide facility-based retrospective cohort study
Source: HighWire-hosted journal article supplement (doi:10.1136/bmjopen-2015-009734), 2016-01-01

Figure 1: Trends in maternal death causes, from 2009 to 2013 (N=987)

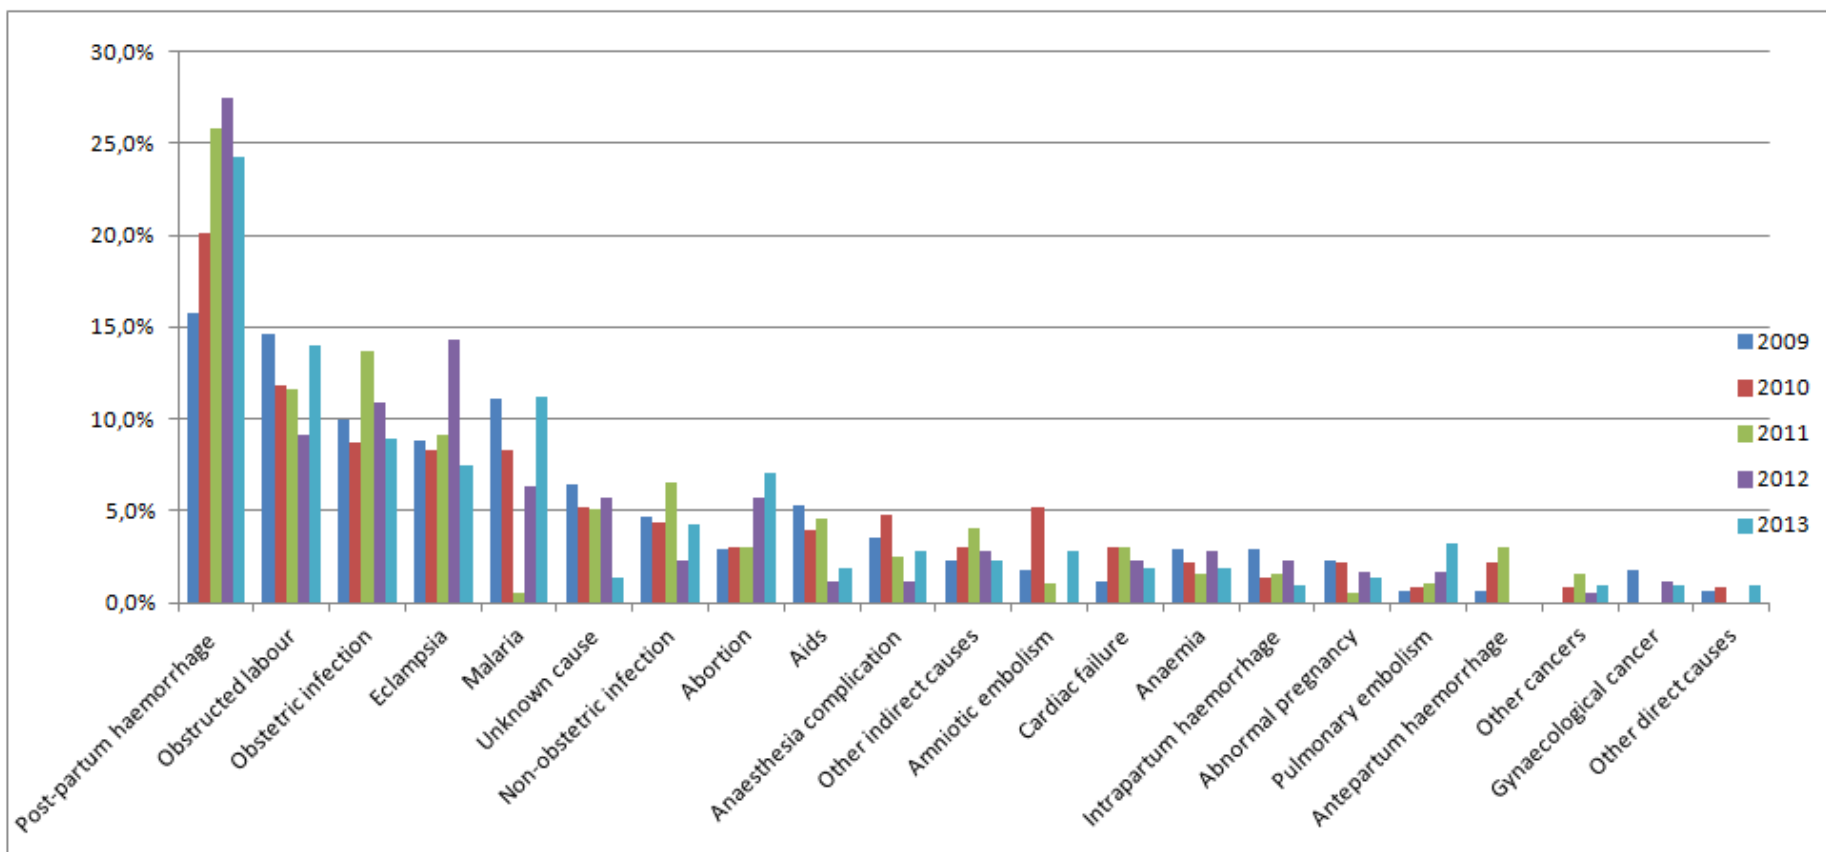

## APPENDIX

### Box 2. Substandard factors identified in maternal death audits

| 61.1% Health system factors (N=603)                                                                                                                                                                                                                                                                                                                                                                                                                                                                                                                                                                                                                                                                                                                                                                                                                                                                                                                                                                                    | 30.3% Patient/community factors (N=299)                                                                                                                                                                                                                                                                                                                                                                                                                                                                                            |
|------------------------------------------------------------------------------------------------------------------------------------------------------------------------------------------------------------------------------------------------------------------------------------------------------------------------------------------------------------------------------------------------------------------------------------------------------------------------------------------------------------------------------------------------------------------------------------------------------------------------------------------------------------------------------------------------------------------------------------------------------------------------------------------------------------------------------------------------------------------------------------------------------------------------------------------------------------------------------------------------------------------------|------------------------------------------------------------------------------------------------------------------------------------------------------------------------------------------------------------------------------------------------------------------------------------------------------------------------------------------------------------------------------------------------------------------------------------------------------------------------------------------------------------------------------------|
| <ul style="list-style-type: none"> <li>• Poor case management (248)</li> <li>• Delay to refer the patient at high level (105)</li> <li>• Lack of skilled staff (48)</li> <li>• Insufficient diagnostic means (40)</li> <li>• Inadequate monitoring of labour and/or use of partograph (33)</li> <li>• Delay to recognize the complication (28)</li> <li>• Insufficient follow up in post-operative period (22)</li> <li>• Delay of the ambulance to reach the health centre (14)</li> <li>• No respect of asepsis (14)</li> <li>• Insufficient follow up in post-partum period (8)</li> <li>• Lack of isogroup blood (8)</li> <li>• Inadequate post-partum follow up (6)</li> <li>• Not following protocol (6)</li> <li>• Inadequate resuscitation (5)</li> <li>• Insufficient follow-up of anaesthesia induction (4)</li> <li>• Delay to administer the correct treatment (3)</li> <li>• Insufficient pre- operative preparation (2)</li> <li>• Poor quality of ANC visit (2)</li> <li>• Other factors (7)</li> </ul> | <ul style="list-style-type: none"> <li>• Delay to consult the health facility (183)</li> <li>• Poor maternal compliance (77)</li> <li>• No use of health facility (8)</li> <li>• Refusal to comply with treatment (7)</li> <li>• Poor hygiene (6)</li> <li>• Refusal to be referred at high level (6)</li> <li>• No use of mosquito nets (5)</li> <li>• Refusal blood transfusion (3)</li> <li>• Consulted traditional healers (2)</li> <li>• No respect of ANC visit (1)</li> <li>• Patient refusal to be operated (1)</li> </ul> |

**Figure 2: Distribution of substandard case management and poor maternal compliance identified in maternal death audits, 2009-2013**

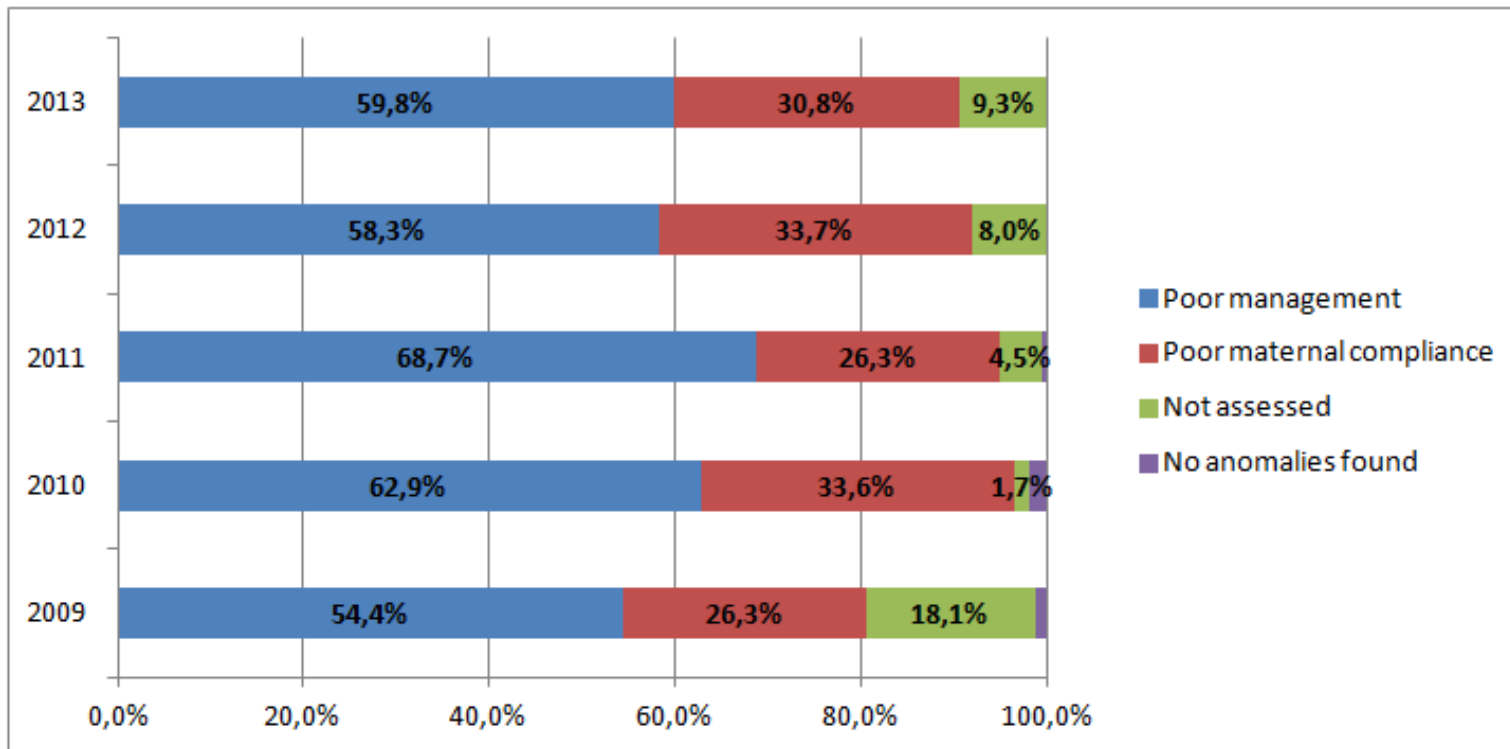

Supplement: bmjopen-2015-009734supp.pdf [file bmjopen-2015-009734supp.pdf]
